# Supplementary material for: Estimation of Methane Emissions from Slurry Pits below Pig and Cattle Confinements
Source: PLOS journal article supplement (doi:10.1371/journal.pone.0160968), 2016-08-16
Supplement: S1 (10.1371/journal.pone.0160968.s001) [file journal.pone.0160968.s001]

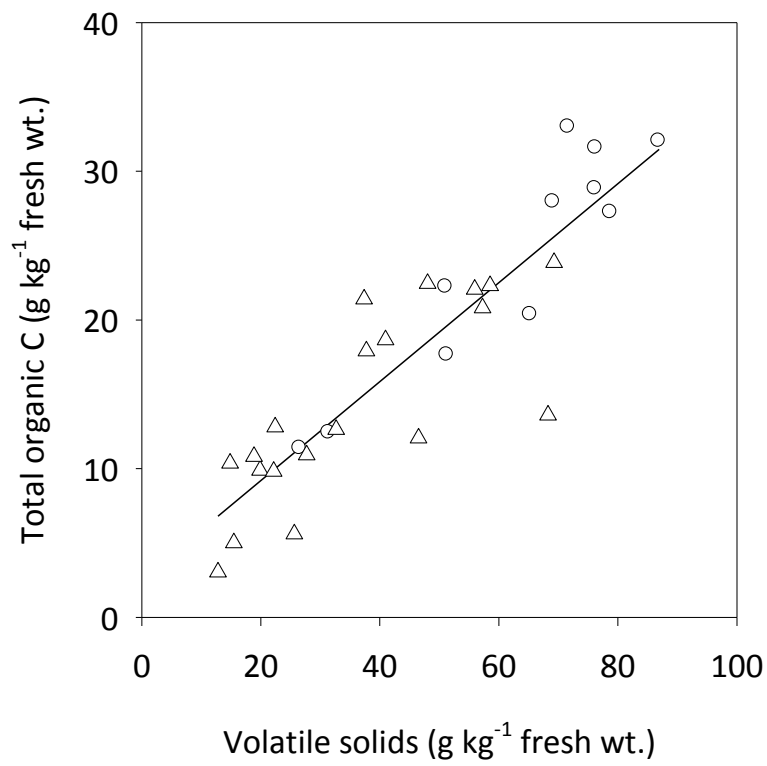

**S1 Fig. Relationship between volatile solids in cattle (circles) and pig (triangles) slurry materials and TOC.**
