# Supplementary material for: Estimation of Methane Emissions from Slurry Pits below Pig and Cattle Confinements
Source: PLOS journal article supplement (doi:10.1371/journal.pone.0160968), 2016-08-16
Supplement: S3 (10.1371/journal.pone.0160968.s003) [file journal.pone.0160968.s003]

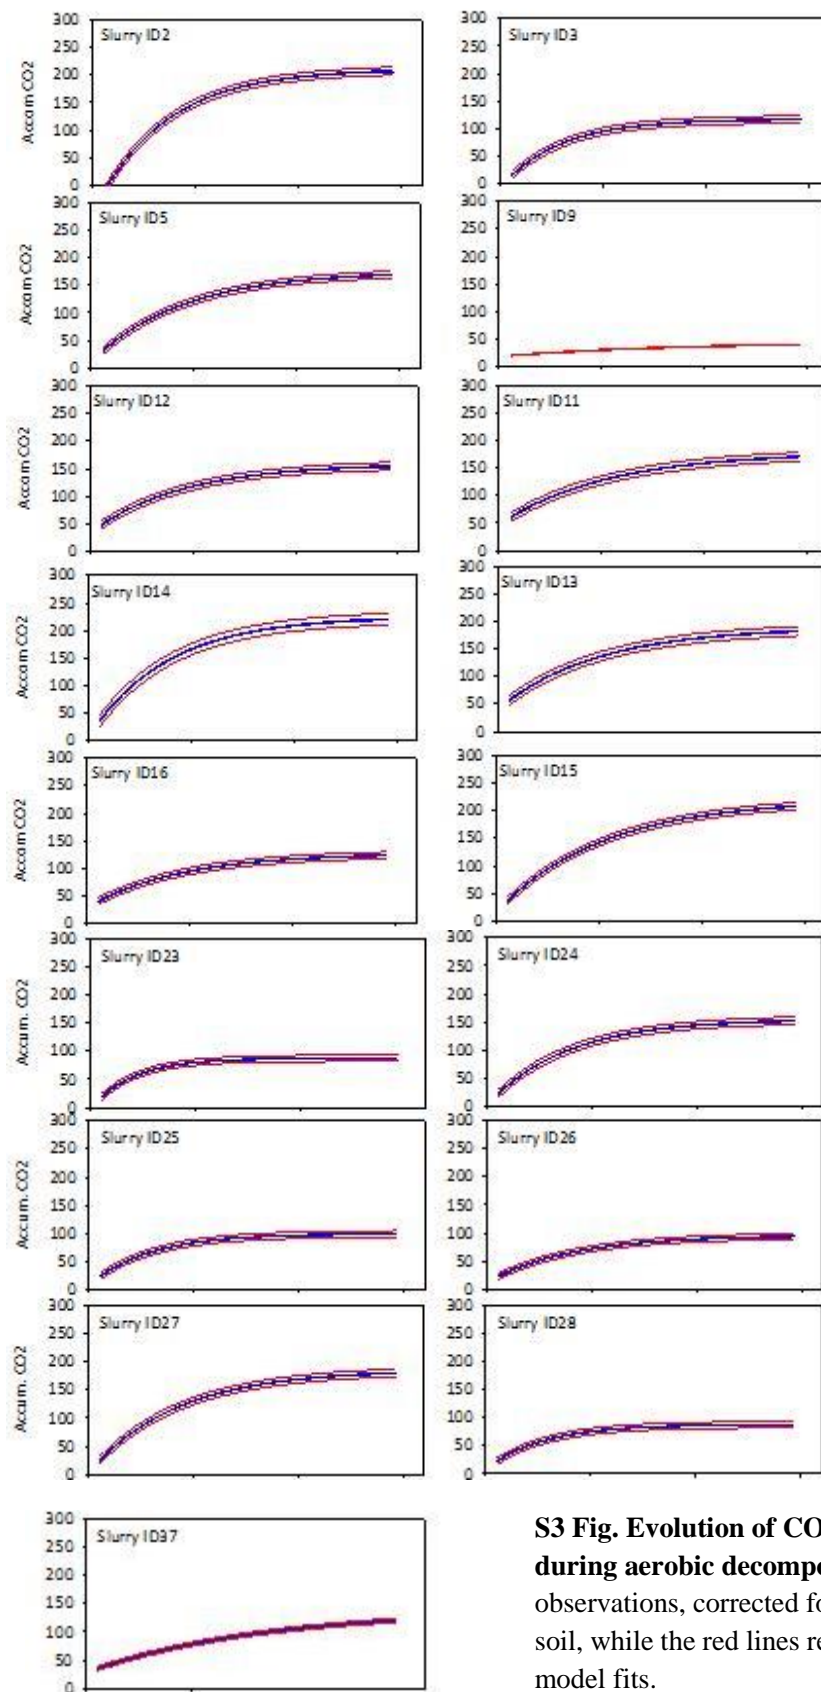

**S3 Fig. Evolution of CO<sub>2</sub>-C from pig slurry samples during aerobic decomposition.** The blue lines represent observations, corrected for background emissions from the soil, while the red lines represent 95% confidence limits of model fits.
