# Supplementary material for: Estimation of Methane Emissions from Slurry Pits below Pig and Cattle Confinements
Source: PLOS journal article supplement (doi:10.1371/journal.pone.0160968), 2016-08-16
Supplement: S6 (10.1371/journal.pone.0160968.s006) [file journal.pone.0160968.s006]

**S3 Table. Dry matter (%) in slurry delivered to Thorsø Biogas plant during 2014.** For information about farms, please refer to Table S1. Data were obtained from the biogas plant manager, Anders Nedergaard.

| <b>Farm ID</b><br>1) | <b>Animal category</b> | <b>Housing system</b>    | <b>DM (%)</b> |     |     |
|----------------------|------------------------|--------------------------|---------------|-----|-----|
|                      |                        |                          | Avg           | min | max |
| G1                   | Dairy cattle           | Cubicles                 | 6.5           | 6   | 6.9 |
| G2                   | Dairy cattle           | Cubicles                 | 5.6           | 4.8 | 6.4 |
| G3                   | Finishing pigs         | Partly slatted           | 4.1           | 3.3 | 5   |
| G4                   | Finishing pigs         | Partly slatted           | 5.2           | 4.6 | 6.3 |
| G5                   | Dairy cattle           | Cubicles                 | 6.5           | 5.3 | 8.6 |
| G6                   | Dairy cattle           | Cubicles                 | 9.2           | 9.2 | 9.2 |
| G7                   | Farrowing sows         | Loose, indiv confinement | 3.5           | 1   | 7   |

- 1) Geographical coordinates: G1 - 56°21'10" N, 9°48'10" E; G2 - 56°18'02" N, 9°43'42" E; G3 - 56°20'13" N, 9°53'13" E; G4 - 56°21'06" N, 9°45'26" E; G5 - 56°21'29" N, 9°52'12" E; G6 - 56°16'11" N, 9°45'24" E; G7 - 56°21'02" N, 9°49'06" E.
